# Supplementary material
Source: PubMed Central journal article supplement (PMC4503518)
Supplement: NIHMS656364-supplement.pdf [file NIHMS656364-supplement.pdf]

## **Alterations of Mitochondrial DNA Copy Number and Telomere Length with Early Adversity and Psychopathology**

### *Supplemental Information*

#### **Unadjusted Means (Raw values, prior to log transformation)**

*Mitochondrial DNA Copy Number.* Unadjusted means were  $M = 231.8$ ,  $SD = 121.9$  for the No Adversity/No Disorder group;  $M = 260.1$ ,  $SD = 117.7$  for the Adversity/No Disorder group;  $M = 286.3$ ,  $SD = 140.8$  for the No Adversity/Disorder group; and  $M = 281.3$ ,  $SD = 127.2$  for the Adversity/Disorder group.

Unadjusted means for individual disorders were  $M = 269.1$ ,  $SD = 113.9$  for the group with lifetime MDD;  $M = 274.3$ ,  $SD = 129.7$  for the group with any lifetime depressive disorder;  $M = 283.8$ ,  $SD = 128.3$  for the group with lifetime PTSD;  $M = 294.3$ ,  $SD = 122.7$  for the group with any lifetime anxiety disorder; and  $M = 280.4$ ,  $SD = 108.4$  for the group with past alcohol or substance disorders.

Unadjusted means for individual types of adversity were  $M = 296.3$ ,  $SD = 128.0$  for the group who experienced parental loss, and  $M = 270.6$ ,  $SD = 126.3$  for the group with any form of maltreatment on the CTQ.

*Telomere Length.* Unadjusted means for the Adversity/Disorder grouping variable were  $M = 7181.00$ ,  $SD = 4362.80$  for the No Adversity/No Disorder group;  $M = 6432.9$ ,  $SD = 3372.7$  for the Adversity/No Disorder group;  $M = 5854.1$ ,  $SD = 4250.9$  for the No Adversity/Disorder group; and  $M = 5642.7$ ,  $SD = 4138.2$  for the Adversity/Disorder group.

Unadjusted means for the individual disorders were  $M = 4933.0$ ,  $SD = 3189.2$  for the group with lifetime MDD;  $M = 4855.5$ ,  $SD = 3525.5$  for the group with any lifetime depressive disorder;  $M = 5064.7$ ,  $SD = 2616.6$  for the group with lifetime PTSD,  $M = 4802.8$ ,  $SD = 2960.1$  for the group with any lifetime anxiety disorder; and  $M = 6893.3$ ,  $SD = 4216.0$  for the group with past alcohol or substance disorders.

Unadjusted means for the early adversity types were  $M = 6482.9$ ,  $SD = 3932.3$  for the group who experienced parental loss and  $M = 6034.1$ ,  $SD = 3784.0$  for the group with any form of maltreatment on the CTQ.

### General Linear Models (GLMs)

The following tables show the results of the full GLMs. Standardized regression coefficients,  $B$ , are shown to display the relative contribution of variables in the model.

**Table S1.** General linear model predicting mitochondrial copy number

| <b>Source</b>                     | <b><i>df</i></b> | <b><i>F</i></b> | <b><i>B</i></b> | <b><i>p</i></b> |
|-----------------------------------|------------------|-----------------|-----------------|-----------------|
| Adversity/Disorder Grouping       | 3                | 8.40            | .28             | .00             |
| Telomere Length                   | 1                | 42.59           | .36             | .00             |
| Age                               | 1                | 2.23            | -.09            | .14             |
| Gender                            | 1                | .01             | .00             | .95             |
| Childhood Socioeconomic Adversity | 1                | .16             | -.02            | .69             |
| Education                         | 1                | 1.25            | .06             | .26             |
| BMI                               | 1                | .02             | -.01            | .90             |
| Error                             | 280              |                 |                 |                 |

**Table S2.** General linear model predicting telomere length

| <b>Source</b>                     | <b><i>df</i></b> | <b><i>F</i></b> | <b><i>B</i></b> | <b><i>p</i></b> |
|-----------------------------------|------------------|-----------------|-----------------|-----------------|
| Adversity/Disorder Grouping       | 3                | 6.39            | -.25            | .00             |
| Mtdna Copy Number                 | 1                | 42.59           | .36             | .00             |
| Age                               | 1                | .62             | -.04            | .43             |
| Gender                            | 1                | .22             | .03             | .64             |
| Childhood Socioeconomic Adversity | 1                | 1.26            | -.07            | .26             |
| Education                         | 1                | .00             | .00             | .99             |
| BMI                               | 1                | 2.34            | -.08            | .13             |
| Error                             | 280              |                 |                 |                 |

## **Sensitivity Analyses**

The following analyses did not control for the significant positive association of telomere length and mtDNA copy number.

*Mitochondrial DNA Copy Number.* When predicting mtDNA copy number without controlling for telomere length, the grouping variable was still a significant predictor of mtDNA copy number, but the Adversity/No Disorder group differed from the controls only at trend level ( $p = .069$ ), and the Adversity/No Disorder group was not different from the Adversity/Disorder group ( $p = .193$ ) or No Adversity/Disorder group ( $p = .245$ ). The findings for individual disorders and adversity types all remained significant.

*Telomere Length.* When predicting telomere length without controlling for mtDNA copy number, the findings remained significant except that the effect for the No Adversity/Disorder group was reduced to trend level ( $p = .057$ ), as was the difference between the Adversity/No Disorder group and the Adversity/Disorder group ( $p = .083$ ). Findings for individual disorders remained significant except for lifetime PTSD ( $p = .100$ ). Parental loss was associated with telomere length at trend level ( $p = .056$ ) and the effect of any form of maltreatment on the CTQ was no longer significant ( $p = .127$ ).
